# Supplementary material for: A Testing Campaign Intervention Consisting of Peer-Facilitated Engagement, Point-of-Care HCV RNA Testing, and Linkage to Nursing Support to Enhance Hepatitis C Treatment Uptake among People Who Inject Drugs: The ETHOS Engage Study
Source: Viruses. 2022 Jul 16;14(7):1555. doi: 10.3390/v14071555 (PMC9316739; doi:10.3390/v14071555)
Supplement: Supplementary file 1 [file viruses-14-01555-s001.zip › viruses-1783087-supplementary.pdf]

**Supplementary Figure S1.** Promotional material to advertise ETHOS Engage study prior to recruitment.

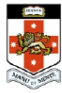

UNSW  
SYDNEY

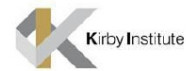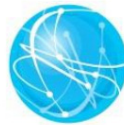

ETHOS ENGAGE

## Get your liver scan and Hep C testing!

You can participate in this study if you have a history of injecting drugs and are:

- Over 18
- Currently on OST (methadone or buprenorphine) or have recently injected drugs (last 6 months)\*

### #1 Complete a short survey

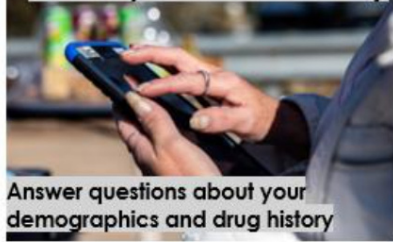

Answer questions about your demographics and drug history

### #2 Take the tests

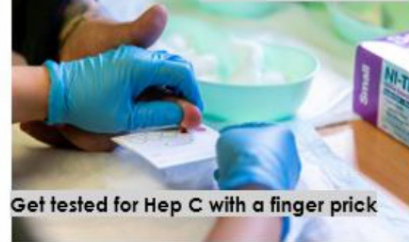

Get tested for Hep C with a finger prick

### #3 Get a FibroScan®

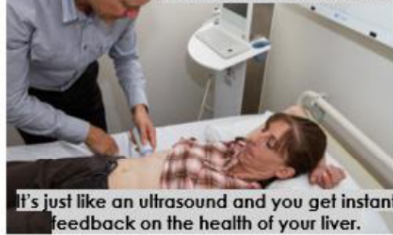

It's just like an ultrasound and you get instant feedback on the health of your liver.

### #4 See the nurse

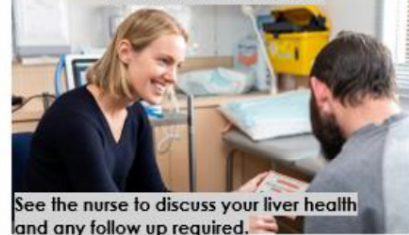

See the nurse to discuss your liver health and any follow up required.

You will receive a **\$30** gift voucher in return for taking part.

Join the study here: **Address.**

**Wednesday 19<sup>th</sup> May: 9am-11am, Thursday 20<sup>th</sup> & Friday 21<sup>st</sup> May: 9am-3pm.**

**Please call (Number) for further details.**

Your participation in this study is confidential.

The ethical aspects of this research project have been approved by the HREC of St Vincent's Hospital (reference number: HREC/17/SVH/113)

Version 3.0, 11 October 2019

**Supplementary Figure S2.** ETHOS Engage participant flowchart, current HCV status and treatment uptake at 24 months post-enrolment (N = 1388).

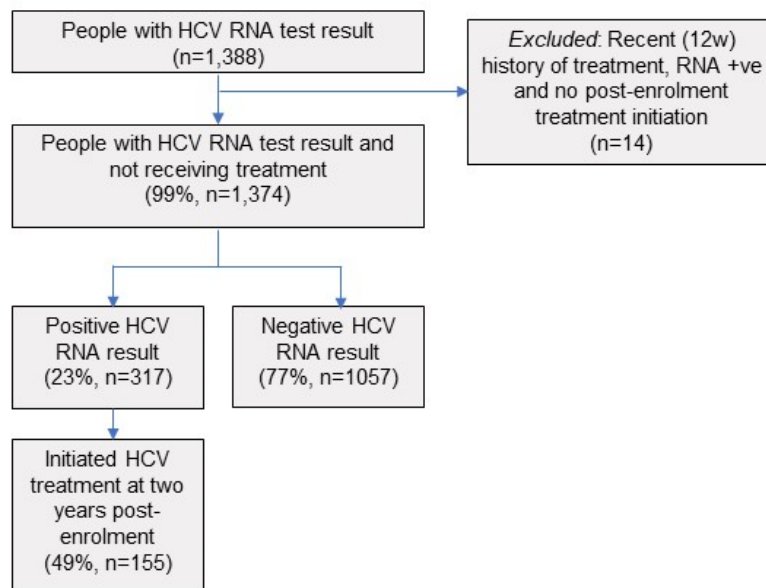

**Supplementary Table S1.** Characteristics of study population according to current HCV infection (N=1374).

| Characteristic                             |                         | All         | No current HCV infection | Current HCV infection |
|--------------------------------------------|-------------------------|-------------|--------------------------|-----------------------|
|                                            |                         | N (col%)    | n (col%)                 | n (col%)              |
| Total (N)                                  |                         | 1374 (100%) | 1057 (100%)              | 317 (100%)            |
| Age at enrolment                           | Median (IQR)            | 43 (37-50)  | 43 (37-50)               | 43 (37-49)            |
| Gender                                     | Male                    | 880 (64%)   | 675 (64%)                | 205 (65%)             |
|                                            | Female                  | 491 (36%)   | 381 (36%)                | 110 (35%)             |
|                                            | Other                   | 3 (0%)      | 1 (0%)                   | 2 (1%)                |
| Aboriginal or Torres Strait Islander       | No                      | 1052 (77%)  | 811 (77%)                | 241 (76%)             |
|                                            | Yes                     | 322 (23%)   | 246 (23%)                | 76 (24%)              |
| Homeless                                   | No                      | 1227 (89%)  | 959 (91%)                | 268 (85%)             |
|                                            | Yes                     | 147 (11%)   | 98 (9%)                  | 49 (15%)              |
| Currently receiving OAT                    | No                      | 387 (28%)   | 289 (27%)                | 98 (31%)              |
|                                            | Yes                     | 987 (72%)   | 768 (73%)                | 219 (69%)             |
| Incarceration history                      | Never                   | 451 (33%)   | 378 (36%)                | 73 (23%)              |
|                                            | More than 12 months ago | 678 (53%)   | 506 (48%)                | 172 (61%)             |
|                                            | In last 12 months       | 245 (14%)   | 173 (16%)                | 72 (16%)              |
| Recency of injecting                       | More than a month ago   | 506 (37%)   | 410 (39%)                | 96 (30%)              |
|                                            | Within last month       | 868 (63%)   | 647 (61%)                | 221 (70%)             |
| Hazardous alcohol consumption <sup>†</sup> | No                      | 871 (63%)   | 683 (65%)                | 188 (59%)             |
|                                            | Yes                     | 500 (36%)   | 373 (35%)                | 127 (40%)             |
| Fibrosis - Fibroscan result (kpa)          | <7.0                    | 966 (70%)   | 782 (74%)                | 184 (58%)             |
|                                            | >7.0                    | 320 (23%)   | 205 (19%)                | 115 (36%)             |
|                                            | Unknown                 | 88 (6%)     | 70 (7%)                  | 18 (6%)               |

<sup>†</sup> Excluding people who did not identify as men or women (n=2)

Acronyms – OAT: opioid agonist treatment, HCV: hepatitis C virus

**Supplementary Table S2.** Cumulative probability of treatment initiation by 12 months and 24 months following HCV diagnosis.

|                                            |                         | Follow up time, years (95% CI) |               |
|--------------------------------------------|-------------------------|--------------------------------|---------------|
|                                            |                         | 1                              | 2             |
| Overall                                    |                         | 38% (33%-44%)                  | 62% (55%-69%) |
| Age at enrolment                           | <45                     | 35% (29%-43%)                  | 58% (49%-68%) |
|                                            | ≥45                     | 42% (34%-51%)                  | 67% (57%-77%) |
| Gender                                     | Male                    | 38% (32%-45%)                  | 58% (50%-67%) |
|                                            | Female                  | 37% (29%-47%)                  | 69% (57%-80%) |
|                                            | Other                   | -                              | -             |
| Aboriginal or Torres Strait Islander       | No                      | 41% (35%-47%)                  | 66% (58%-74%) |
|                                            | Yes                     | 30% (21%-42%)                  | 50% (36%-66%) |
| Homeless                                   | No                      | 42% (37%-48%)                  | 66% (58%-73%) |
|                                            | Yes                     | 16% (9%-30%)                   | 42% (25%-65%) |
| Currently receiving OAT                    | No                      | 31% (23%-41%)                  | 58% (44%-73%) |
|                                            | Yes                     | 42% (35%-48%)                  | 64% (56%-72%) |
| Incarceration history                      | Never                   | 45% (35%-57%)                  | 78% (65%-89%) |
|                                            | More than 12 months ago | 40% (33%-47%)                  | 64% (54%-73%) |
|                                            | In last 12 months       | 28% (19%-40%)                  | 39% (26%-55%) |
| Recency of injecting                       | More than a month ago   | 41% (32%-51%)                  | 67% (57%-78%) |
|                                            | Within last month       | 37% (31%-44%)                  | 59% (49%-68%) |
| Hazardous alcohol consumption <sup>†</sup> | No                      | 38% (32%-46%)                  | 59% (50%-68%) |
|                                            | Yes                     | 37% (29%-46%)                  | 67% (55%-78%) |
| Fibrosis -Fibroscan result (kpa)           | <7.0                    | 45% (38%-54%)                  | 63% (54%-73%) |
|                                            | >7.0                    | 31% (24%-40%)                  | 61% (50%-72%) |
|                                            | Unknown                 | 28% (13%-54%)                  | 64% (36%-90%) |

<sup>†</sup> Excluding people who did not identify as men or women (n=2)

Acronyms – OAT: opioid agonist treatment, HCV: hepatitis C virus, CI: confidence interval
